# Supplementary material
Source: ML conference proceedings conference paper supplement (https://openreview.net/forum?id=LWr5HKuiI)
Supplement: supplementary_material [file attachment]

**Algorithm 1 IMPROVISED<sup>E</sup>****Definitions:**

- $b$ : common public belief of player  $P_1$  and player  $P_2$
- $\mathcal{A}_i$ : action space of  $P_i$
- $s_i$ : information state of  $P_i$
- $b(s_1)$ : belief of  $P_2$  given  $P_1$ 's information state  $s_1$
- $\pi$ : joint blueprint policy
- $R(s_1, s_2, \pi, [a_1, a_2])$ : reset current game state with  $s_1, s_2$ , rollout until termination following (the optional  $[a_1, a_2]$  and then)  $\pi$ , and return the total reward.

**Method:**

```

initialize  $q_\pi(a_1, a_2, b) = 0$  for  $(a_1, a_2) \in \mathcal{A}_1 \times \mathcal{A}_2$ 
sample  $M$  private state for  $P_1, s_1^{(1)}, \dots, s_1^{(M)} \sim b$ 
 $P_\pi(a_1) = \frac{1}{M} \sum_{i=1}^M \pi(a_1 | b(s_1^{(i)}))$  for  $a_1 \in \mathcal{A}_1$ 
for  $s_1^{(i)} \in s_1^{(1)}, \dots, s_1^{(M)}$  do
  sample  $N$  private state for  $P_2, s_2^{(1)}, \dots, s_2^{(N)} \sim b(s_1^{(i)})$ 
   $q_\pi(b, s_1^{(i)}) = \frac{1}{N} \sum_j R(s_1^{(i)}, s_2^{(j)}, \pi)$ 
  for  $(a_1, a_2) \in \mathcal{A}_1 \times \mathcal{A}_2$  do
    if  $P_\pi(a_1) \geq \epsilon_p$  then
       $q_\pi(a_1, a_2, b, s_1^{(i)}) = -\infty$ 
    else
       $q_\pi(a_1, a_2, b, s_1^{(i)}) = \frac{1}{N} \sum_j R(s_1^{(i)}, s_2^{(j)}, \pi, a_1, a_2)$ 
    end if
  end for
end for
for  $(a_1, a_2) \in \mathcal{A}_1 \times \mathcal{A}_2$  do
   $q_\pi(a_1, a_2, b) = \frac{1}{M} \sum_i \max [q_\pi(a_1, a_2, b, s_1^{(i)}), q_\pi(b, s_1^{(i)})]$ 
end for
for  $a_1 \in \mathcal{A}_1$  do
   $f(b, a_1) = \text{softmax}_{a_2} [q_\pi(a_1, a_2, b)/t]$ 
   $q_\pi(b, s_1, a_1) = \mathbb{E}_{s_2' \sim b(s_1), a_2 \sim f(b, a_1)} R(s_1, s_2', \pi, a_1, a_2)$ 
end for
if  $\max q_\pi(b, s_1, a_1) \geq q_\pi(b, s_1) + \epsilon_q$  then
  return  $\text{argmax}_{a_1} q_\pi(b, s_1, a_1)$ 
else
  return  $a_1^{bp}$  // the action under blueprint
end if

```

557 **B Experimental Details for Tiger-Trampoline**

| Hyper-parameter                | Values         |
|--------------------------------|----------------|
| learning rate                  | 0.0005, 0.0001 |
| batch size                     | 16, 32         |
| $\varepsilon$ annealing period | 20000, 10000   |
| RNN hidden dimension           | 64, 32, 16     |

Table 2: Hyper-parameters of QMIX in the Tiger-Trampoline Experiment

558 In Section 5.1 we show the results of MAPPO and QMIX on the Tiger-Trampoline game. For the  
 559 MAPPO we use the default parameters from the open sourced implementation<sup>1</sup> used for Hanabi,  
 560 except with a hidden size of 128, reducing the episode length cap, and reducing the number of threads  
 561 by a factor of 2. For QMIX, we use the open sourced implementation<sup>2</sup> of the algorithm provided as

<sup>1</sup><https://github.com/marlbenchmark/on-policy><sup>2</sup><https://github.com/oxwhirl/pymarl>

part of the PyMARL framework [24]. We used the default agent and training configuration, except for the four hyper-parameters listed in table 2. For those, we tried all combinations of the corresponding values, producing a total of 24 runs, each training for 500k steps, or 250k episodes.

## C Experimental Details for Finesse in Hanabi

In the Hanabi experiments, we implement IMPROVISED as follows (better viewed together with the pseudocode). The belief  $b$  is the common public belief shared by *player 1* and *player 2* based on common knowledge available to all players and their common private knowledge of *player 3*'s hand. We first draw  $M$  Player 2 hands  $s'_1$  from  $b$  and compute blueprint actions  $a_\pi = \pi(b(s'_1))$  and  $P_\pi(a)$ . We then consider joint actions  $\mathcal{A}_1 \times \mathcal{A}_2 = \{(a_1, a_2) | P_\pi(a_1) \leq 0\}$  for *player 1* and *player 2*. Since our goal is to find finesse style joint deviations, we further restrict  $a_1$  to be a *hint move* to *player 3* and  $a_2$  to be a *play move*. Given  $s'_1$ , *player 1* can further induce the private belief  $b(s'_1)$  over their own hand. For each of  $s'_1$ , *player 1* calculates Monte Carlo estimations of  $q(a_1, a_2, b, s'_1)$  for  $(a_1, a_2) \in \mathcal{A}_1 \times \mathcal{A}_2$  and  $q_\pi(b, s'_1)$  with  $N$  samples drawn from  $b(s'_1)$ . So far we have collected all the quantities required to compute the mapping  $f$  for IMPROVISED<sup>P</sup> and for IMPROVISED<sup>E</sup>. Finally, we draw another  $K$  samples from the true  $b(s_1)$  where  $s_1$  now is the real hand of *player 2* to estimate  $\delta = \max_{a_1} \mathbb{E}_{a_2 \sim f(b, a_1)} q_\pi(b, s_1, a_1) - q_\pi(b, s_1)$ . *Player 1* will deviate to  $\arg\max_{a_1} \mathbb{E}_{a_2 \sim a_2^*(a_1)} q_\pi(b, s_1, a_1, a_2)$  if  $\delta \geq 0.05$ . In the next turn, *player 2* can carry out the same computation process to get  $P_\pi(a_1)$  and  $f(b, a_1)$  to figure out whether *player 1* has deviated and if so what is the correct response. *Player 1* and *player 2* do not share the random seed beforehand.

In the experiments where we run IMPROVISED on finesse-complete situations only, we set  $M = 1000$ ,  $N = 100$  and  $K = 10000/|\mathcal{A}_1|$ . It takes roughly 2 hours in total for both *player 1* and *player 2* to compute the deviations independently using 5 CPU cores and 1 GPU.

In the experiments where we run IMPROVISED on the full game of Hanabi, we reduce  $M$  to 400 and share the result of  $f(b, a_1)$  between Player 1 and Player 2 instead of computing it twice independently as we empirically find that the statistic is stable enough against random seeds. A full game then takes around 10-12 hours using 20 CPU cores and 2 GPUs.
